# Supplementary material for: Complete mitochondrial and rDNA complex sequences of important vector species of Biomphalaria, obligatory hosts of the human-infecting blood fluke, Schistosoma mansoni
Source: PubMed Central journal article supplement (PMC5943310; doi:10.1038/s41598-018-25463-z), 2018-05-09

## **Complete mitochondrial and rDNA complex sequences of important vector species of *Biomphalaria*, obligatory hosts of the human-infecting blood fluke, *Schistosoma mansoni***

Si-Ming Zhang, Lijing Bu, Martina R. Laidemitt, Lijun Lu, Martin W. Mutuku, Gerald M. Mkoji, & Eric S. Loker

**Supplementary Figure 1.** The positions related to each element of rDNA cassette are provided in **A**. The nt identity is presented in **B** (28S), **C** (ITS1 (red) and ITS2 (blue)), and **D** (two ITSs combined).

**Supplementary Figure 2.** The phylogenetic trees were built using the three methods (ML, NJ and ME) and three types of sequences (ITS1, ITS2 and ITS1 and 2 combined). For *B. tenagophila* (BT), ITS1 and 2 were from GenBank accession number (AY030388). For *Physella acuta*, ITS1 and 2 were from KF316327 and KF316328, respectively. Please note that ITS1 and 2 sequences were not available in *Radix*, so sequences of ITS1 and 2 from *Physella acuta* were used as outgroup.

**Supplementary Figure 3.** The NJ tree based on partial mtCoxI sequences currently available in GenBank shows the relationships of *B. sudanica* or *B. sudanica*-like snails in Africa. Since there are a large number of sequences from *B. sudanica*-like snails collected from Lake Victoria, only few sequences were randomly selected. All mtCoxI sequences from other localities were used if they could be aligned to the sequences of *B. sudanica* derived from Lake Victoria (Stanley et al., 2011, 2014). The GenBank accession numbers starting with AF, DQ, EU, and HM indicate that data derived from publications of Campbell et al.<sup>37</sup>, Jørgensen et al.<sup>21</sup>, Plam et al.<sup>45</sup>, and Stanley et al.<sup>10,11</sup>, respectively. The mtCoxI sequences of *B. glabrata* G72 M line (Bg), *B. sudanica* (BS) and *B. choanomphala* (BC) were from present study. Geographical locations are provided at the end of the accession numbers.

Suppl Fig.1

**A**

|      | BP        | BS        | BC        | G72M      | G16BS     |
|------|-----------|-----------|-----------|-----------|-----------|
| 18S  | 1-1829    | 1-1829    | 1-1829    | 1-1829    | 1-1829    |
| ITS1 | 1830-2397 | 1830-2379 | 1830-2378 | 1830-2390 | 1830-2390 |
| 5.8S | 2398-2553 | 2378-2535 | 2379-2534 | 2391-2546 | 2391-2546 |
| ITS2 | 2554-2975 | 2536-2972 | 2535-2971 | 2547-2971 | 2547-2971 |
| 28S  | 2976-6755 | 2973-6749 | 2972-6748 | 2972-6765 | 2972-6765 |

**B**

|       | BP | BS    | BC    | G72M  | G16BS |
|-------|----|-------|-------|-------|-------|
| BP    |    | 99.79 | 99.79 | 99.76 | 99.76 |
| BS    |    |       | 100   | 99.84 | 99.84 |
| BC    |    |       |       | 99.84 | 99.84 |
| G72M  |    |       |       |       | 100   |
| G16BS |    |       |       |       |       |

**C**

|       | BP    | BS    | BC    | G72M  | G16BS |
|-------|-------|-------|-------|-------|-------|
| BP    |       | 86.11 | 86.26 | 86.64 | 87.00 |
| BS    | 91.99 |       | 99.82 | 91.26 | 91.26 |
| BC    | 91.92 | 99.77 |       | 91.06 | 91.06 |
| G72M  | 90.74 | 92.91 | 92.91 |       | 99.11 |
| G16BS | 90.74 | 92.91 | 92.91 | 100   |       |

**D**

|       | BP | BS    | BC    | G72M  | G16BS |
|-------|----|-------|-------|-------|-------|
| BP    |    | 90.81 | 90.90 | 87.89 | 87.89 |
| BS    |    |       | 99.80 | 92.08 | 92.08 |
| BC    |    |       |       | 91.97 | 91.97 |
| G72M  |    |       |       |       | 99.49 |
| G16BS |    |       |       |       |       |

Suppl Fig.2

**ML**

**NJ**

**ME**

**ITS1 + ITS2**

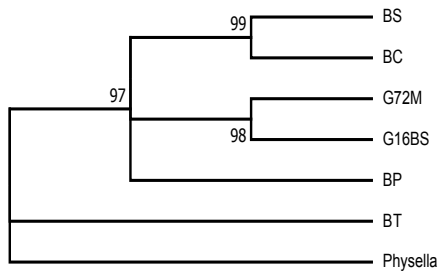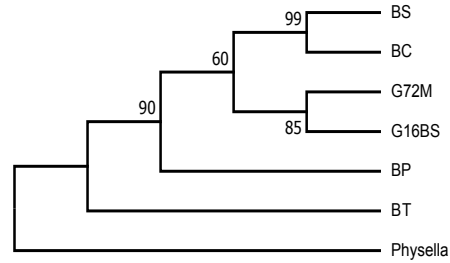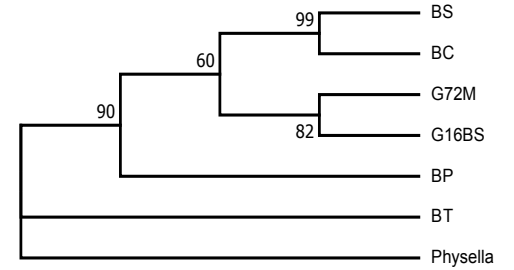

**ITS1**

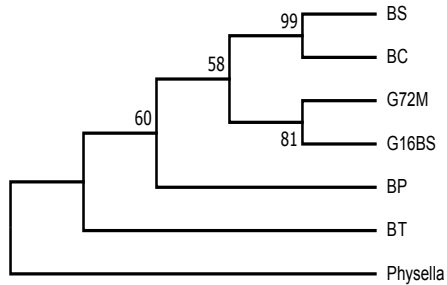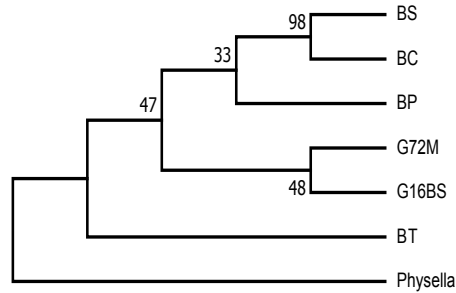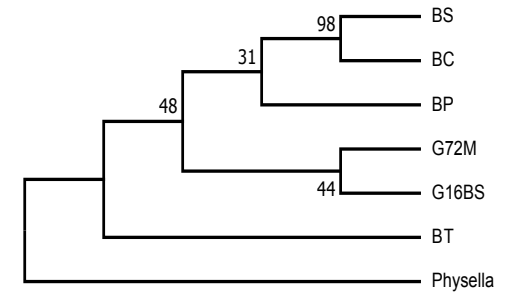

**ITS2**

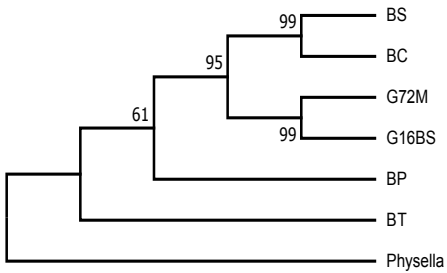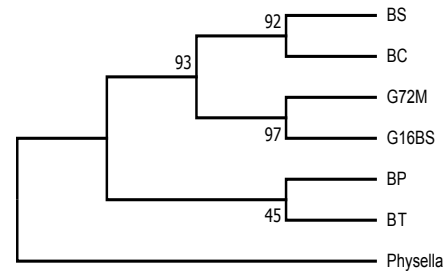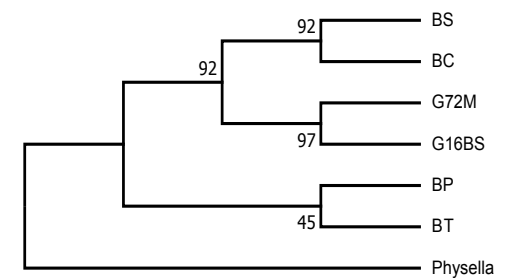

Suppl Fig.2

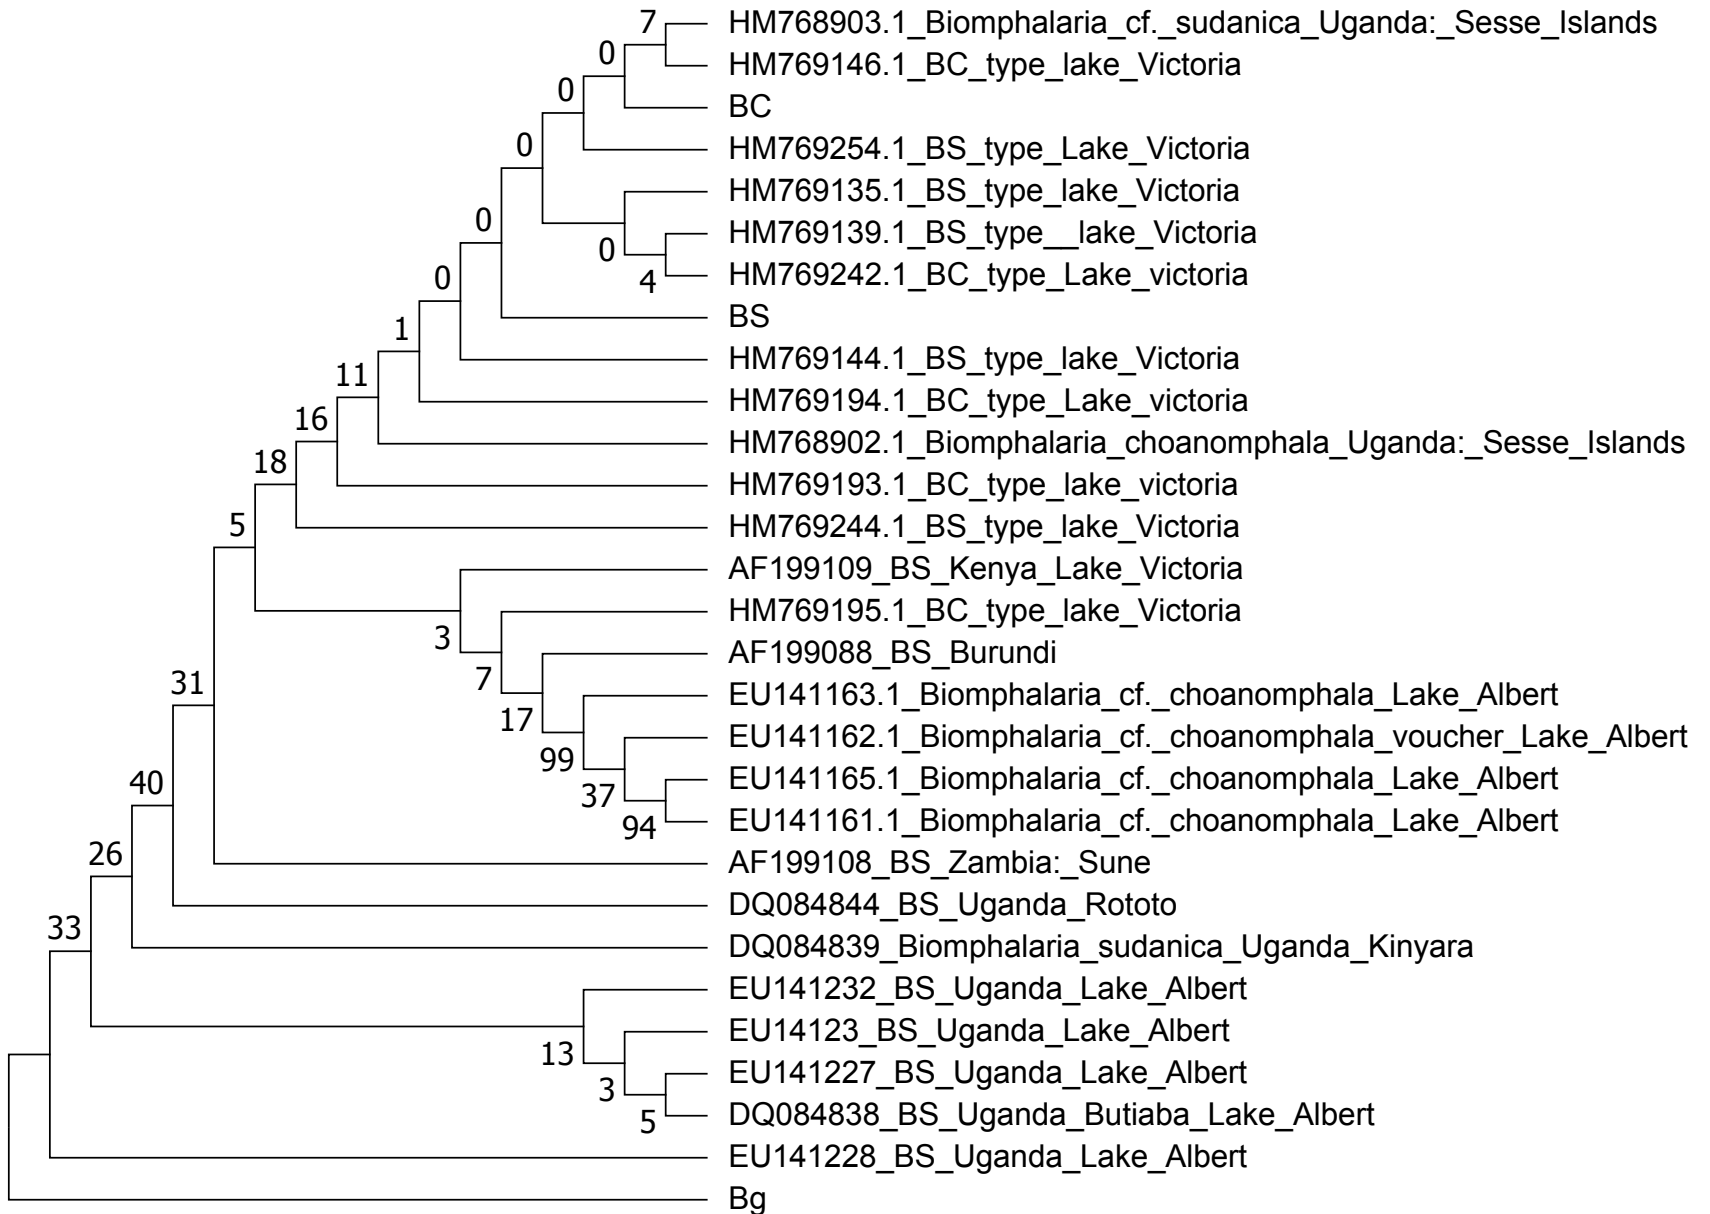

Supplement: 41598_2018_25463_MOESM3_ESM.pdf [file 41598_2018_25463_MOESM3_ESM.pdf]
